# Supplementary material for: Severity and susceptibility: measuring the perceived effectiveness and believability of tobacco health warnings
Source: Springer Nature journal article supplement (doi:10.1186/s12889-018-5385-x), 2018-04-10
Supplement: MOESM1 [file 15604696]

Table 1. Characteristics of participants

|                                                                            | Non-smokers<br>(n = 437) | Smokers<br>(n = 436) | P value for<br>difference |
|----------------------------------------------------------------------------|--------------------------|----------------------|---------------------------|
| Gender (female)                                                            | 221 (50.6)               | 218 (50.0)           | 0.973                     |
| Age                                                                        | 32.6 (11.4)              | 34.1 (11.6)          | 0.067                     |
| Length of time a smoker                                                    |                          |                      |                           |
| ‘Over 5 years’                                                             |                          | 75%                  |                           |
| ‘Between 1 and 5 years’                                                    |                          | 18%                  |                           |
| ‘About a year’                                                             |                          | 6%                   |                           |
| ‘A few months or less’                                                     |                          | 1%                   |                           |
| Ever prevalence of disease                                                 |                          |                      |                           |
| Lung cancer                                                                | 0.5%                     | 0.9%                 | 0.19                      |
| Blindness                                                                  | 0.5%                     | 1.2%                 | 0.11                      |
| Tooth and gum disease                                                      | 8.7%                     | 24.1%                | <0.001                    |
| Education                                                                  |                          |                      | <0.001                    |
| Missing                                                                    | 1 (0.2)                  | 1 (0.2)              |                           |
| Primary or secondary school/vocational level 1 &<br>2/trade apprenticeship | 10 (2.3)                 | 21 (4.8)             |                           |
| Secondary school advanced/vocational level 3                               | 38 (8.7)                 | 66 (15.1)            |                           |
| Further education/training college below degree level                      | 71 (16.2)                | 106 (24.3)           |                           |
| Some university                                                            | 63 (14.4)                | 64 (14.7)            |                           |
| Completed university degree                                                | 183 (41.9)               | 138 (31.7)           |                           |
| Post-graduate degree                                                       | 71 (16.2)                | 40 (9.2)             |                           |
| Income                                                                     |                          |                      | <0.001                    |
| Missing                                                                    | 1 (0.2)                  | 3 (0.7)              |                           |
| < £6500                                                                    | 20 (4.6)                 | 19 (4.4)             |                           |
| £6500 – 15,000                                                             | 41 (9.4)                 | 51 (11.7)            |                           |
| £15,001 – 30,000                                                           | 108 (24.7)               | 167 (38.3)           |                           |
| £30,001 – 40,000                                                           | 86 (19.7)                | 84 (19.3)            |                           |
| £40,001 – 50,000                                                           | 63 (14.4)                | 42 (9.6)             |                           |
| £50,001 – 65,000                                                           | 59 (13.5)                | 35 (8.0)             |                           |
| £65,001 – 95,000                                                           | 39 (8.9)                 | 27 (6.2)             |                           |
| > £95,000                                                                  | 20 (4.6)                 | 8 (1.8)              |                           |
| Location                                                                   |                          |                      | 0.668                     |
| Missing                                                                    | 1 (0.2)                  | 4 (0.9)              |                           |
| England                                                                    | 359 (82.2)               | 363 (83.3)           |                           |
| Wales                                                                      | 26 (5.9)                 | 29 (6.7)             |                           |
| Scotland                                                                   | 41 (9.4)                 | 33 (7.6)             |                           |
| Northern Ireland                                                           | 10 (2.3)                 | 7 (1.6)              |                           |

For categorical variables, values represent percentage. For continuous variables, values represent mean (SD). P-values for the difference between groups was calculated using chi-square (for gender, length of time a smoker, ever prevalence of disease, education, income and location) or *t* tests (for age).
